# Supplementary material
Source: PubMed Central journal article supplement (PMC7397118)
Supplement: supp_RA120.013878_160156_2_supp_539287_qb3gcr.pdf [file supp_RA120.013878_160156_2_supp_539287_qb3gcr.pdf]

**Table S1: Hemicellulosic/pectin sugar composition (% Dry weight) of sequentially extracted cell wall fractions of 7-day old *Col-0* and *gh43null* seedlings.** The sugar composition of AIR1/AIR2 treated cell wall material and sequential extracted CaCl<sub>2</sub> soluble, CDTA, NaOH and the cell wall residue was measured. The material was Trimethylsilyl (TMS) derivatised and quantified with a GC/MS according to an inositol internal standard and a monosaccharide sugar standard (*n* = 3 biological pooled replicates).

|                                 | Treatment                                | Ara                        | Rha                        | Fuc                        | Xyl                        | Man                        | Me-GlcA                    | Gal                        | GalA                       | Glc                        | GlcA                       | Total                        |
|---------------------------------|------------------------------------------|----------------------------|----------------------------|----------------------------|----------------------------|----------------------------|----------------------------|----------------------------|----------------------------|----------------------------|----------------------------|------------------------------|
| <i>Col-0</i><br><i>gh43null</i> | AIR1+ AIR2                               | 2.52 ± 0.05<br>2.31 ± 0.16 | 2.73 ± 0.06<br>2.48 ± 0.24 | 0.90 ± 0.02<br>0.87 ± 0.02 | 2.50 ± 0.05<br>2.24 ± 0.21 | 1.09 ± 0.02<br>1.10 ± 0.05 | 1.47 ± 0.03<br>1.40 ± 0.03 | 3.98 ± 0.15<br>3.45 ± 0.30 | 7.28 ± 0.20<br>6.42 ± 0.56 | 1.87 ± 0.10<br>1.95 ± 0.20 | 1.72 ± 0.43<br>1.77 ± 0.30 | 26.06 ± 0.84<br>23.99 ± 2.02 |
| <i>Col-0</i><br><i>Gh43null</i> | CaCl <sub>2</sub> soluble                | 4.29 ± 0.08<br>3.91 ± 0.53 | 0.86 ± 0.05<br>0.73 ± 0.06 | 0.90 ± 0.08<br>0.73 ± 0.01 | 0.79 ± 0.06<br>0.67 ± 0.03 | 1.07 ± 0.06<br>0.84 ± 0.05 | 2.09 ± 0.14<br>1.66 ± 0.13 | 5.49 ± 0.20<br>4.77 ± 0.57 | 2.45 ± 0.19<br>2.14 ± 0.34 | 1.55 ± 0.09<br>1.51 ± 0.07 | 1.11 ± 0.08<br>0.89 ± 0.04 | 20.59 ± 0.69<br>16.94 ± 1.69 |
| <i>Col-0</i><br><i>gh43null</i> | 50 mM CDTA                               | 0.76 ± 0.05<br>0.70 ± 0.03 | 0.64 ± 0.04<br>0.61 ± 0.04 | 0.70 ± 0.04<br>0.64 ± 0.03 | 0.57 ± 0.03<br>0.54 ± 0.02 | 0.67 ± 0.04<br>0.61 ± 0.03 | 1.04 ± 0.06<br>0.95 ± 0.05 | 0.97 ± 0.06<br>0.89 ± 0.04 | 4.14 ± 0.52<br>4.04 ± 0.82 | 0.67 ± 0.04<br>0.62 ± 0.03 | 0.84 ± 0.07<br>0.74 ± 0.03 | 11.01 ± 0.94<br>10.35 ± 0.87 |
| <i>Col-0</i><br><i>gh43null</i> | 4M NaOH<br>0.1% w/v<br>NaBH <sub>4</sub> | 1.75 ± 0.19<br>1.72 ± 0.11 | 1.63 ± 0.20<br>1.62 ± 0.07 | 1.09 ± 0.09<br>1.04 ± 0.03 | 6.16 ± 0.80<br>5.88 ± 0.51 | 2.04 ± 0.23<br>2.07 ± 0.09 | 1.65 ± 0.13<br>1.59 ± 0.05 | 2.84 ± 0.32<br>2.83 ± 0.23 | 2.22 ± 0.23<br>2.52 ± 0.04 | 4.96 ± 0.58<br>4.90 ± 0.26 | 1.03 ± 0.07<br>1.04 ± 0.10 | 25.39 ± 2.83<br>25.20 ± 1.24 |
| <i>Col-0</i><br><i>gh43null</i> | Cell wall<br>residue                     | 2.84 ± 0.18<br>2.59 ± 0.14 | 2.92 ± 0.18<br>2.70 ± 0.17 | 0.81 ± 0.03<br>0.73 ± 0.02 | 1.42 ± 0.09<br>1.23 ± 0.05 | 0.75 ± 0.02<br>0.69 ± 0.01 | 1.31 ± 0.04<br>1.17 ± 0.05 | 3.10 ± 0.18<br>2.62 ± 0.16 | 5.43 ± 0.37<br>5.13 ± 0.59 | 4.47 ± 0.15<br>4.20 ± 0.15 | 1.90 ± 0.14<br>1.68 ± 0.13 | 24.94 ± 1.33<br>22.75 ± 1.21 |

| <b>Probe</b> | <b>Specificity</b>                                                                                   | <b>Reference</b>                                |
|--------------|------------------------------------------------------------------------------------------------------|-------------------------------------------------|
| JIM5/7       | Homogalacturonan                                                                                     | (Clausen et al., 2003)                          |
| LM5          | (1,4)- $\beta$ -D-Gal <sub>4</sub>                                                                   | (Jones et al., 1997)                            |
| LM6          | (1,5)- $\alpha$ -L-Araf <sub>n</sub> , branches tolerated                                            | (Willats et al., 1998)                          |
| LM18/19/20   | Homogalacturonan                                                                                     | (Verherbruggen et al., 2009)                    |
| INRA-RU1/2   | Backbone of RG-I                                                                                     | (Ralet et al., 2010)                            |
| LM15         | XXXG-motif in xyloglucan                                                                             | (Marcus et al., 2008)                           |
| LM25         | XLLG, XXLG, XXXG in xyloglucan                                                                       | (Pedersen et al., 2012)                         |
| LM10/11      | (1,4)- $\beta$ -D-xylan                                                                              | (McCartney et al., 2005)                        |
| LM28         | Glucuronosyl-containing epitope in heteroxylan                                                       | (Cornuault et al., 2015)                        |
| LM23         | Non-acetylated xylosyl residues                                                                      | (Manabe et al., 2011)                           |
| BS400-4      | (1,4)- $\beta$ -D-mannan/galactomannan                                                               | (Pettolino et al., 2001)                        |
| CBM3a        | CBM binding crystalline cellulose w. xyloglucan cross-reactivity                                     | (Blake et al., 2006)                            |
| LM1          | Extensin                                                                                             | (Smallwood et al., 1995)                        |
| LM3          | Extensin                                                                                             | (Castilleux et al., 2018)                       |
| JIM11/12/20  | Extensin                                                                                             | (Smallwood et al., 1994)                        |
| LM2          | GlcA that is terminally attached to 1,6-linked galactan                                              | (Smallwood et al., 1996; Ruprecht et al., 2017) |
| LM14         | Arabinogalactan protein                                                                              | (Moller et al., 2008)                           |
| JIM13        | Arabinogalactan protein                                                                              | (Yates et al., 1996)                            |
| JIM16        | $\beta$ -1,3-linked galactan backbone when substituted with a single $\beta$ -1,6-linked Gal residue | (Ruprecht et al., 2017)                         |
| MAC207       | Arabinogalactan protein                                                                              | (Yates et al., 1996)                            |

**Blake AW, McCartney L, Flint JE, Bolam DN, Boraston AB, Gilbert HJ, Knox JP. 2006.** Understanding the biological rationale for the diversity of cellulose-directed carbohydrate-binding modules in prokaryotic enzymes. *Journal of Biological Chemistry* **281**(39): 29321-29329.

**Castilleux R, Plancot B, Ropitiaux M, Carreras A, Leprince J, Boulogne I, Follet-Gueye ML, Popper ZA, Driouch A, Vire M. 2018.** Cell wall extensins in root-microbe interactions and root secretions. *Journal of Experimental Botany* **69**(18): 4235-4247.

**Clausen MH, Willats WG, Knox JP. 2003.** Synthetic methyl hexagalacturonate hapten inhibitors of anti-homogalacturonan monoclonal antibodies LM7, JIM5 and JIM7. *Carbohydr Res* **338**(17): 1797-1800.

**Cornuault V, Buffetto F, Rydahl MG, Marcus SE, Torode TA, Xue J, Crépeau M-J, Faria-Blanc N, Willats WG, Dupree P. 2015.** Monoclonal antibodies indicate low-abundance links between heteroxylan and other glycans of plant cell walls. *Planta* **242**(6): 1321-1334.

**Manabe Y, Nafisi M, Verherbruggen Y, Orfila C, Gille S, Rautengarten C, Cherk C, Marcus SE, Somerville S, Pauly M, et al. 2011.** Loss-of-function mutation of REDUCED WALL ACETYLATION2 in Arabidopsis leads to reduced cell wall acetylation and increased resistance to Botrytis cinerea. *Plant Physiol* **155**(3): 1068-1078.

**Marcus SE, Verherbruggen Y, Herve C, Ordaz-Ortiz JJ, Farkas V, Pedersen HL, Willats WG, Knox JP. 2008.** Pectic homogalacturonan masks abundant sets of xyloglucan epitopes in plant cell walls. *BMC Plant Biol* **8**: 60.

**McCartney L, Marcus SE, Knox JP. 2005.** Monoclonal antibodies to plant cell wall xylans and arabinoxylans. *J Histochem Cytochem* **53**(4): 543-546.

**Moller I, Marcus SE, Haeger A, Verherbruggen Y, Verhoef R, Schols H, Ulvskov P, Mikkelsen JD, Knox JP, Willats W. 2008.** High-throughput screening of monoclonal antibodies against plant cell wall glycans by hierarchical clustering of their carbohydrate microarray binding profiles. *Glycoconjugate Journal* **25**(1): 37-48.

**Pedersen HL, Fangel JU, McCleary B, Ruzanski C, Rydahl MG, Ralet MC, Farkas V, von Schantz L, Marcus SE, Andersen MC, et al. 2012.** Versatile high resolution oligosaccharide microarrays for plant glycobiology and cell wall research. *J Biol Chem* **287**(47): 39429-39438.

**Pettolino FA, Hoogenraad NJ, Ferguson C, Bacic A, Johnson E, Stone BA. 2001.** A (1  $\rightarrow$  4)-beta-mannan-specific monoclonal antibody and its use in the immunocytochemical location of galactomannans. *Planta* **214**(2): 235-242.

**Ralet MC, Tranquet O, Poulain D, Moise A, Guillon F. 2010.** Monoclonal antibodies to rhamnogalacturonan I backbone. *Planta* **231**(6): 1373-1383.

**Ruprecht C, Bartetzko MP, Senf D, Dallabernadina P, Boos I, Andersen MCF, Kotake T, Knox JP, Hahn MG, Clausen MH, et al. 2017.** A Synthetic Glycan Microarray Enables Epitope Mapping of Plant Cell Wall Glycan-Directed Antibodies. *Plant Physiol* **175**(3): 1094-1104.

**Smallwood M, Beven A, Donovan N, Neill SJ, Peart J, Roberts K, Knox JP. 1994.** Localization of Cell-Wall Proteins in Relation to the Developmental Anatomy of the Carrot Root Apex. *Plant Journal* **5**(2): 237-246.

**Smallwood M, Martin H, Knox JP. 1995.** An epitope of rice threonine- and hydroxyproline-rich glycoprotein is common to cell wall and hydrophobic plasma-membrane glycoproteins. *Planta* **196**(3): 510-522.

**Smallwood M, Yates EA, Willats WGT, Martin H, Knox JP. 1996.** Immunochemical comparison of membrane-associated and secreted arabinogalactan-proteins in rice and carrot. *Planta* **198**(3): 452-459.

**Verherbruggen Y, Marcus SE, Haeger A, Ordaz-Ortiz JJ, Knox JP. 2009.** An extended set of monoclonal antibodies to pectic homogalacturonan. *Carbohydr Res* **344**(14): 1858-1862.

**Willats WG, Marcus SE, Knox JP. 1998.** Generation of monoclonal antibody specific to (1 $\rightarrow$ 5)-alpha-L-arabinan. *Carbohydr Res* **308**(1-2): 149-152.

**Yates EA, Valdor JF, Haslam SM, Morris HR, Dell A, Mackie W, Knox JP. 1996.** Characterization of carbohydrate structural features recognized by anti-arabinogalactan-protein monoclonal antibodies. *Glycobiology* **6**(2): 131-139.

| <b>Table S3: Primers used for genotyping and cloning</b> |    |                                          |
|----------------------------------------------------------|----|------------------------------------------|
| <b>Genotyping primers</b>                                |    |                                          |
| gh43a-1                                                  | LP | ATCAGGTAAGCAACACCCATCG                   |
| gh43a-1                                                  | RP | CATCTTTGCATTGCAATGATG                    |
| gh43b-1                                                  | LP | ACGAAAACAGAGCAGCACAAAC                   |
| gh43b-1                                                  | RP | ATCGGTGTTGGATGTTACTCG                    |
| gh43b-2                                                  | LP | TCTTTGTTCCCGTGACAGATC                    |
| gh43b-2                                                  | RP | TCCGTGTCTGTCCAAATTCTC                    |
| LBb1.3                                                   | LB | ATTTTGCCGATTCGGAAC                       |
| LB1                                                      | LB | ATTAGGCACCCCAGGCTTACTTTATG               |
| <b>Cloning primers</b>                                   |    |                                          |
| gh43a c-YFP                                              | FW | CAAAAAGCAGGCTCCATGATTCATAACTTTATTACCCAGG |
|                                                          | RV | AGAAAGCTGGGTCGGCAGGCAGCCGCCATTACTGT      |
| gh43b c-YFP                                              | LP | CAAAAAGCAGGCTCCagggattgattgaagtttggtg    |
|                                                          | RP | AGAAAGCTGGGTCGGCAGCAATCTTCTTCTCTTGCTG    |
