# Supplementary material
Source: PubMed Central journal article supplement (PMC7397118)
Supplement: supp_RA120.013878_160156_2_supp_540681_qbtw3t.pdf [file supp_RA120.013878_160156_2_supp_540681_qbtw3t.pdf]

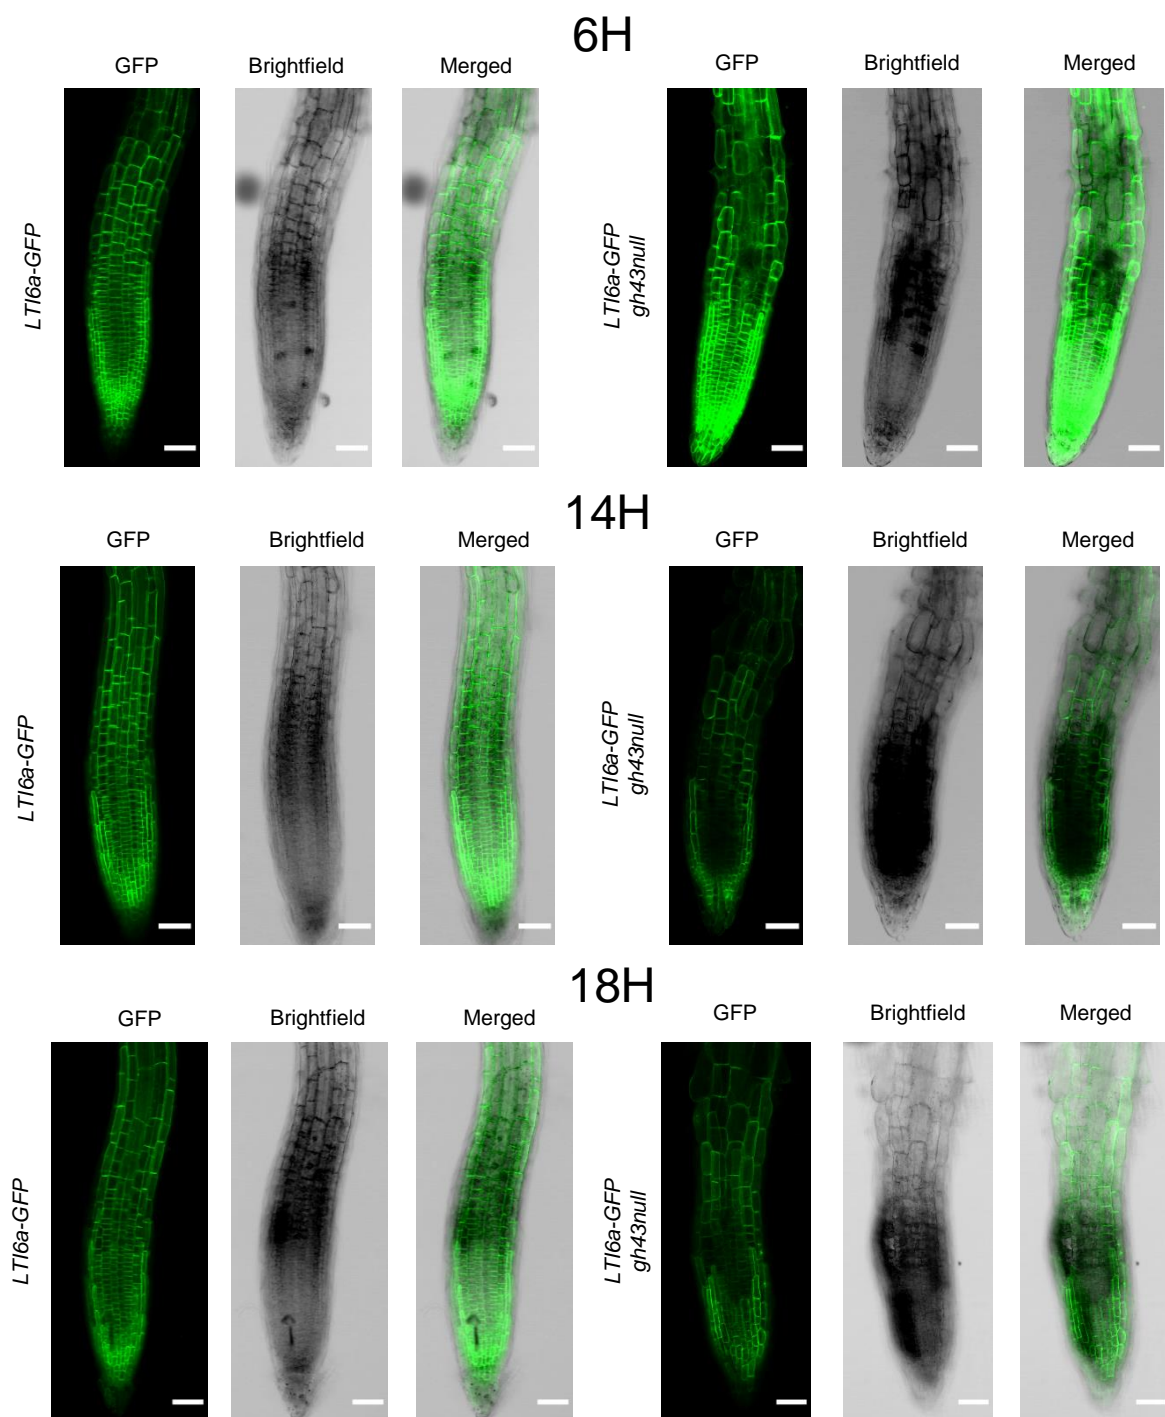

**Figure S1. Confocal laser scanning microscope images of wild type and *gh43null* mutant roots expressing the cell membrane marker LTI6a-GFP.** Seedlings were first grown for 4 days on  $\frac{1}{2}$  MS medium and then moved to  $\frac{1}{2}$  MS medium containing 4.5% glucose. Images were taken every 4 hours after seedlings were moved to sugar plates (scale bar: 100 μm).

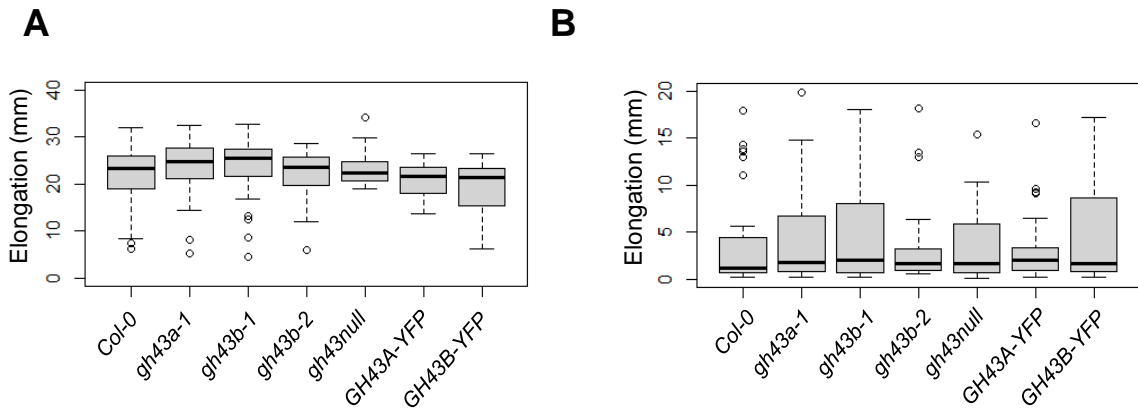

**Figure S2. Root elongation in *gh43* mutants grown on (A) 4.5% sorbitol or (B) 100mM NaCl.** Seedlings were first grown for 4 days on  $\frac{1}{2}$  MS and then moved to 4.5% sorbitol or to 100 mM NaCl containing  $\frac{1}{2}$  MS plates. Root elongation was quantified 6 days after seedlings were moved. The boxplot's dark horizontal lines represent the median, the two grey boxes the 25<sup>th</sup> and 75<sup>th</sup> percentile, the whiskers the 1.5 interquartile limits and the dots the outliers.  $n = 29$ -32 biological replicates.

```

GH43A      -MKKNNKYNKKSTSLHCNDAGGCRYSLLTIVWTVVGGFFLVAHLISLYSRKDNNIHQQVSS 59
GH43B      MRVMKNKHKKATFLRCSP-----FGLVSTVVGCVFMIHLTMLYSRSYSVD----- 46
           :*:***:* *:*          : :* **** .: : * ****. .

GH43A      DQLQVVHHLAHPIVRELIRVEEEVLRMPPPRKRSPRTSKRRSRKPIPLVEEFLDDKSPIR 119
GH43B      LDLSPQLLIHHPIVRELERVEEENIHMPPPRKRSPRAIKRKPKTPTTLVEEFLDENSQIR 106
           :*      : ***** ***** :*****: * : : * *****: * **

GH43A      HLFFPGIKTAAFPGTK -DMGNETSYYPGKIWMDTQGNPIQAHGGGILLDVKSNTYYWYG 178
GH43B      HLFFPDMKSA -FGPTKEDTNDTSHYYFPGRIWTDTEGNPIQAHGGGILFDDISKVYYWYG 165
           *****: :* **** * .: : *****: ** * :*****: * * : : ****

GH43A      EYKDGPTYHAHKKGPARVDIIGVGCYSSKDLWTWKNEGIVLGAEEETNKTHDLHKS NVLER 238
GH43B      EYKDGPTYLSHKGAARVDIIGVGCYSSKDLWTWKNEGVLAEEETDETHDLHKS NVLER 225
           ***** :*** *****:*****: ** .****: :*****

GH43A      PKVIYNEKTEKYVMMHIDDANYTKASVGVAISNSPTGPFYLYSKRPHGFDSRDMTVFK 298
GH43B      PKVIYNSDTGKYVMMHIDDANYTKASVGVAISDNPTGPFYLYSRSPHGFDSRDMTVYK 285
           ***** . * *****:*****: .*****:*****: *****: *

GH43A      DDDGVAYLIYSSEVNSVLHIGPLTEDYLDVTPVMKRMVGVQHREAPAIKFKHQNIYYMVT 358
GH43B      DDDNVAYLIYSSDNLHIGPLTENYLDVKPVMKRIMVGVQHREAPAIKFKHQNTYYMITS 345
           *** .***** *****:****.*****:*****:***** ***: **

GH43A      WCTGWAPNEALAHAAESIMGPWEKLGNPCIGGNKVFRLTTFFAQSTYVIPLPGVPGAFIF 418
GH43B      GCTGWAPNEALAHAAESIMGPWETLGNPCVGGNSIFRSTTFFAQSTFVIPLPGVPGVFI 405
           *****:*****.*****:***. : * *****:*****.***

GH43A      MADRWNPADLRDSRYLWLPVIGGPADQPLEFNGFSPWSRVSIYWSKWRLP----- 471
GH43B      MADRWNPADLRDSRYLWLPVIGGPADRPLEYSFGFPMNSRVSVYWHRQWRLPSAREKKI 465
           *****:*****:*****:***. : * * *****:*** :****

GH43A      - 471
GH43B      A 466

```

**Figure S3. Protein sequence alignment of GH43A (AT5G67540.1) and GH43B (AT3G49880) performed with ClustalW.** The GH43A and GH43B proteins are more than 90% similar in their predicted enzymatic domain, which in GH43A corresponds to amino acids 145-425, and in GH43B to amino acids 158-440aa.

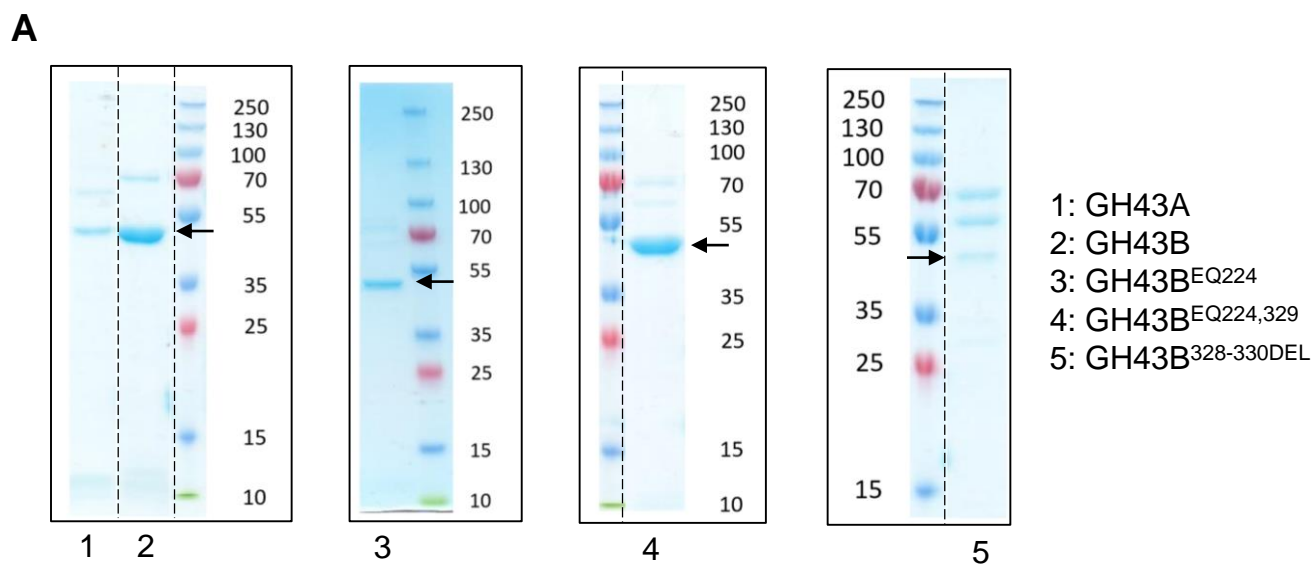

**B**

```

Ct1, 3Gal43A    SNL-----FLGVSCYRSKDLVNWEYRGEVLSRNSAPEL----NHCNIERPKVMY      118
AtGH43A        PTYHAHKKGPARDVIIGVGCYSSKDLWTWKNEGIVLGAEEETNKTHDLHKSNVLERPKVIY      238
AtGH43B        PTYLSHKKGAAARVDIIGVGCYSSKDLWTWKNEGVVLAEEETDETHDLHKSNVLERPKVIY      230
                .          :.:.**.* * * * * .*. *. * * . :. : . : : * : : * * * * * :*

Ct1, 3Gal43A    NASTGEFVMMHWENGINYQARAAVAYSKTPDGKFTYIRSFQDMQDTGVMDHGLPGYMS      178
AtGH43A        NEKTEKYVMMHIDD-ANYTKASVGVAISNSPTGPFYLYSKRP-----HGFDS          286
AtGH43B        NSDTGKYVMMHIDD-ANYTKASVGVAISDNPTGPFYLYSRSP-----HGFDS          278
                * . * :. * * * * * :. : * * : * . * * * * . * * * : * * * * : * * *

Ct1, 3Gal43A    RDCNVFVDTDGKGYFISAANENMDLHLYELTPDYKNIASLKAKLFVGGQREAPCLIKRNG      238
AtGH43A        RDMTVFKDDDGVAAYLIYSSEVNSVLHIGPLTEDYLDVTPVMKRVMVGGQHREAPAIFKHQN      346
AtGH43B        RDMTVYKDDDNVAYLIYSSEDNSVLHIGPLTENYLDVKPVMKRIMVGGQHREAPAIFKHQN      338
                ** . * : * * . * * * :. : * * * : * * * : * : : :. * * * * * * * :. : * .

```

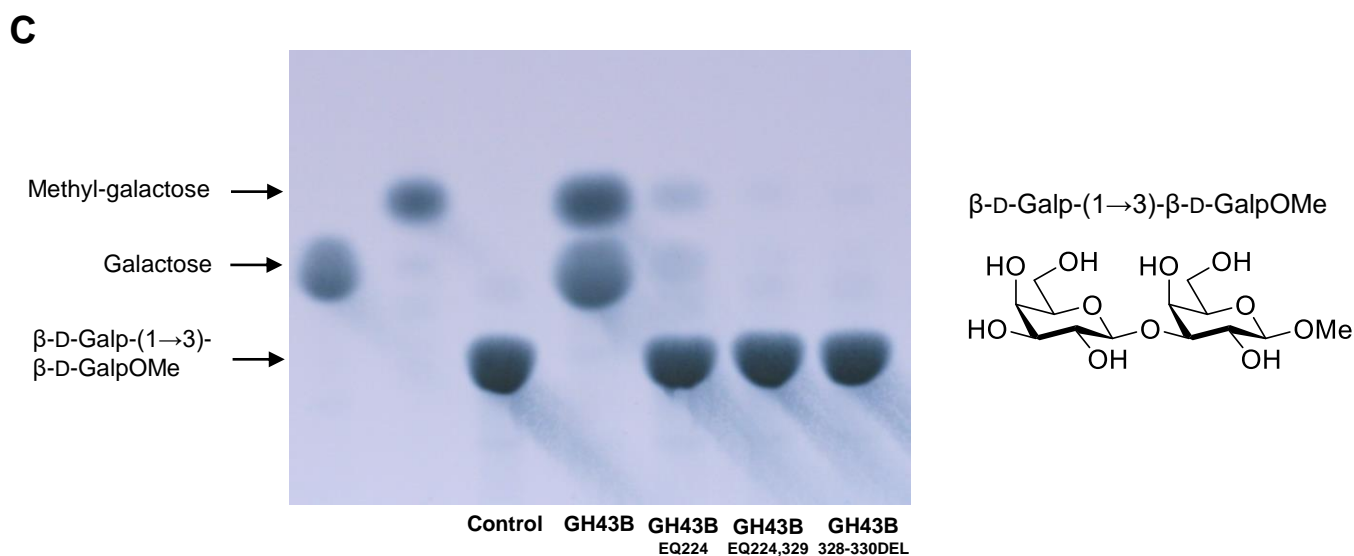

**Figure S4. Testing the activity of heterologously expressed GH43B proteins with mutations in predicted active sites**

**(A)** Heterologously expressed GH43 proteins. Dotted lines indicate splicing between gels.

**(B)** Predicted active sites highlighted in bold and yellow based on the crystal structure of 1,3Gal43A from *Clostridium thermocellum* (Jiang et al. 2012).

**(C)** GH43B with mutations/deletions in putative active site(s), lose activity towards Methyl  $\beta$ -D-galactopyranosyl-(1→3)- $\beta$ -D-galactopyranoside.

**A**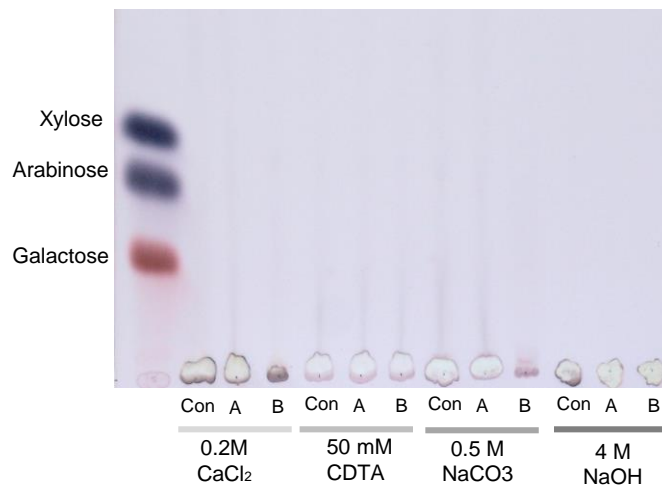**B**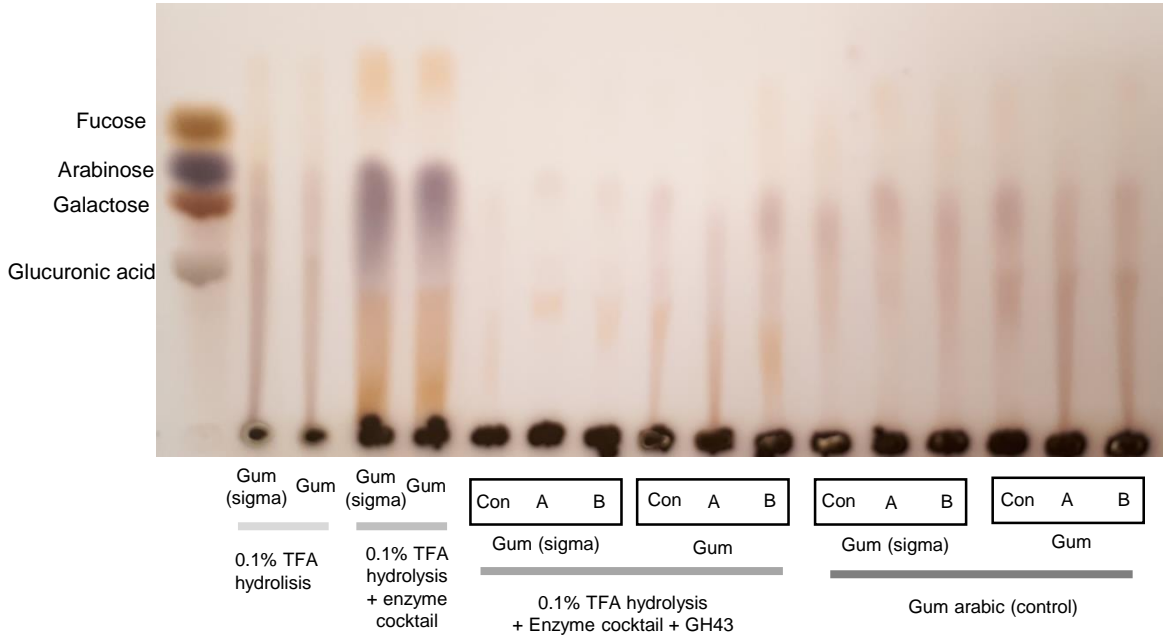**C**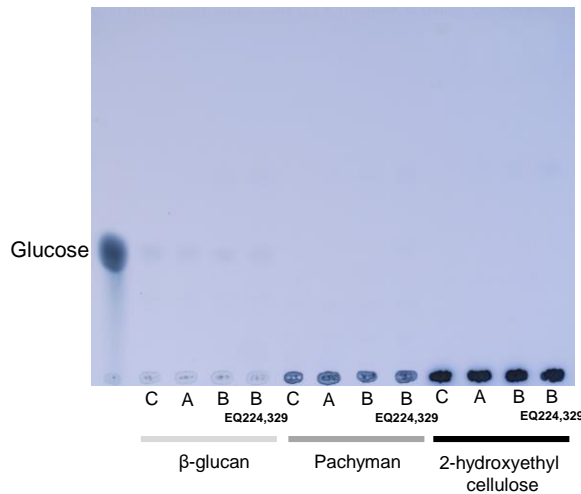

**Figure S5. Activity assay of the heterologously expressed GH43s on Gum Arabic, partially digested Gum Arabic, sequentially extracted cell wall material and  $\beta$ 1,3 or  $\beta$ 1,4 glucan substrates. (A) No activity on sequentially extracted cell wall material isolated from wild type Col-0 rosette leaves. (B) No activity on Gum Arabic or partially trimmed Gum Arabic, which was first partially hydrolysed in 0.1M TFA, then digested with an enzyme cocktail to remove most side chains of AGP glycosylation. The digestion products were buffer changed and then hydrolyzed with the GH43 enzymes. (C) No activity on  $\beta$ -glucan, pachyman or 2-hydroxyethyl cellulose. C/Con=control, A= GH43A, B=GH43B and B<sup>EQ224,329</sup>= GH43B<sup>EQ224,229</sup>**

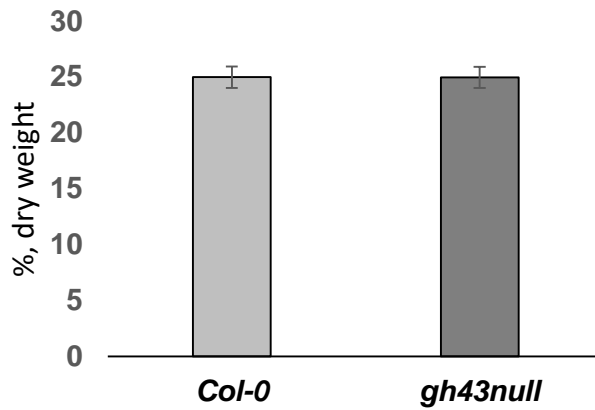

**Figure S6. Crystalline cellulose content of 7 day old seedlings grown on ½ MS plates.** Crystalline cellulose was quantified from AIR1 and AIR2 treated 7 day old cell wall material from *Arabidopsis* seedlings.  $n = 5$  biological replicate seedlings pools.

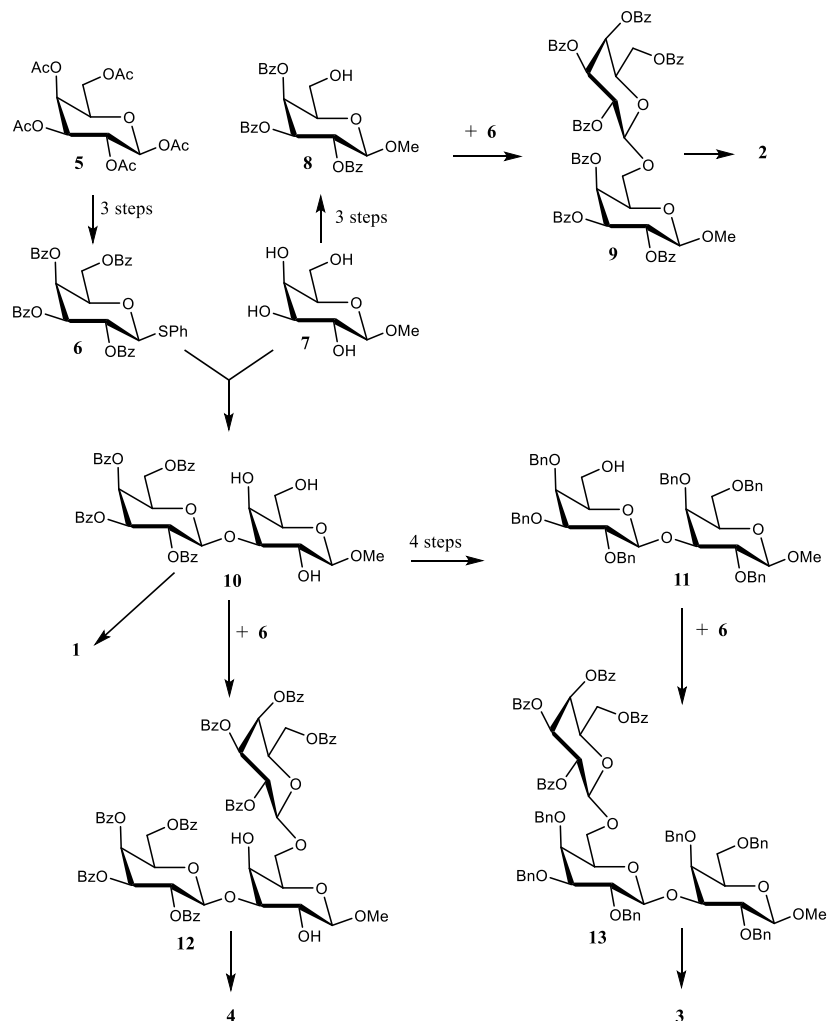

**Figure S7.** The strategy for chemical synthesis of methyl β-galactopyranosides 1-4.

In this strategy, commercially available 1,2,3,4,6-penta-O-acetyl-β-D-galactopyranose (**5**) and methyl β-D-galactopyranoside (**7**) were used as the starting materials. Compound **5** was converted into phenyl 2,3,4,6-tetra-O-benzoyl-1-thio-β-D-galactopyranoside (**6**) and compound **7** was converted into methyl 2,3,4-tri-O-benzoyl-β-D-galactopyranoside (**8**) (Nashed and Glaudemans 1987) as described by literature. Glycosidation reaction between the phenylthio galactopyranoside derivative **5** as a glycosyl donor using the methyl galactopyranoside **7** as the glycosyl acceptor with the activator NIS-TfOH system (Kaji et al., 2010) according to the reported procedure provided the corresponding disaccharide derivatives **10**. Removal of the protecting groups from compounds **10** afforded the desired disaccharide **1**. Further glycosidation of compound **10** afforded the target trisaccharide **4** as described (Kaji et al., 2010). On the other hand, compound **10** was manipulated and converted into methyl 2,4,6-tri-O-benzyl-3-O-(2,3,4-tri-O-benzyl-β-D-galactopyranosyl)-β-D-galactopyranoside (**11**) in four steps using conventional procedures. Similarly, glycosidation reaction between the glycosyl donor **6** and the glycosyl acceptors **8** and/or **11** with the activator NIS-TfOH system (Kaji et al., 2010) provided both the corresponding disaccharide derivative **9** and/or the trisaccharide derivative **13**. Removal of the protecting groups from both compounds **9** and **13** afforded the desired disaccharide **2** and the trisaccharide **3**. Detailed experimental data will be published elsewhere.

**Kaji E, Nishino T, Ishige K, Ohya Y, Shirai Y.** 2010. Regioselective glycosylation of fully unprotected methyl hexopyranosides by means of transient masking of hydroxy groups with arylboronic acids. *Tetrahedron Letters* 51(12): 1570-1573.

**Nashed EM, Glaudemans CP.** 1987. Selective silylation of β-D-galactosides. A new approach to the synthesis of (1,6)-β-D-galactopyranooligosaccharides. *The Journal of Organic Chemistry* 52(23): 5255-5260.
